# Supplementary material
Source: publisher figshare collection journal article supplement (https://acs.figshare.com/ndownloader/files/3810478)
Supplement: Supplementary file 1 [file 3810478]

Supporting Information

# Photoactivatable BODIPYs Designed to Monitor the Dynamics of Supramolecular Nanocarriers

Yang Zhang,<sup>†</sup> Subramani Swaminathan,<sup>†</sup> Sicheng Tang,<sup>†</sup> Jaume Garcia-Amorós,<sup>†</sup> Marcia Boulina,<sup>‡</sup> Burjor Captain,<sup>†</sup> James D. Baker<sup>§</sup> and  
Francisco M. Raymo<sup>\*,†</sup>

*Laboratory for Molecular Photonics, Department of Chemistry, University of Miami, 1301 Memorial Drive, Coral Gables, FL 33146-0431, Department of Biology, University of Miami, 1301 Memorial Drive, Coral Gables, FL 33146-0431 and Analytical Imaging Core Facility, Diabetes Research Institute, University of Miami, 1450 NW 10<sup>th</sup> Avenue, Miami, FL 33136*

*E-Mail: fraymo@miami.edu*

---

|                                                                                                                             |    |
|-----------------------------------------------------------------------------------------------------------------------------|----|
| • Crystallographic Data for <b>1</b> .....                                                                                  | S2 |
| • Emission Spectra of <b>2</b> , <b>3</b> , <b>5</b> , <b>6</b> and <b>12</b> .....                                         | S3 |
| • Differential Pulse Voltammograms of <b>1</b> and <b>12</b> .....                                                          | S3 |
| • Dependence of the Emission Intensity of <b>12</b> on the Concentration of <b>13</b> .....                                 | S3 |
| • Fluorescence Images of <b>3</b> in PBMA .....                                                                             | S4 |
| • Fluorescence Images of Nanoparticles of <b>13</b> , Doped with <b>3</b> or <b>12</b> , in Alginate Hydrogels .....        | S4 |
| • Fluorescence Images of Nanoparticles of <b>13</b> , Doped with <b>3</b> , in <i>Drosophila Melanogaster</i> Embryos ..... | S5 |

<sup>†</sup> Department of Chemistry

<sup>‡</sup> Diabetes Research Institute

<sup>§</sup> Department of Biology

**Table S1.** Crystallographic Data for **1**.

|                                                                          |                                                               |
|--------------------------------------------------------------------------|---------------------------------------------------------------|
| <i>Empirical Formula</i>                                                 | C <sub>18</sub> H <sub>18</sub> N <sub>2</sub> O <sub>3</sub> |
| <i>Formula Weight</i>                                                    | 310.34                                                        |
| <i>Crystal System</i>                                                    | Monoclinic                                                    |
| <i>Lattice Parameters:</i>                                               |                                                               |
| <i>a</i> (Å)                                                             | 8.2502(3)                                                     |
| <i>b</i> (Å)                                                             | 17.5045(6)                                                    |
| <i>c</i> (Å)                                                             | 11.1549(4)                                                    |
| <i>β</i> (°)                                                             | 105.933(1)                                                    |
| <i>V</i> (Å <sup>3</sup> )                                               | 1549.05(10)                                                   |
| <i>Space Group</i>                                                       | <i>P</i> 2 <sub>1</sub> / <i>n</i> (# 14)                     |
| <i>Z</i> Value                                                           | 4                                                             |
| <i>ρ</i> <sub>calc</sub> (g cm <sup>-3</sup> )                           | 1.331                                                         |
| <i>μ</i> (Mo Kα) (mm <sup>-1</sup> )                                     | 0.092                                                         |
| <i>T</i> (K)                                                             | 296                                                           |
| <i>2Θ</i> <sub>max</sub> (°)                                             | 54.0                                                          |
| <i>No. Obs.</i> ( <i>I</i> > 2σ( <i>I</i> ))                             | 3046                                                          |
| <i>No. Parameters</i>                                                    | 212                                                           |
| <i>Goodness of Fit</i>                                                   | 1.043                                                         |
| <i>Max. Shift in Cycle</i>                                               | 0.001                                                         |
| <i>Residuals</i> *: R1; wR2                                              | 0.0392; 0.1063                                                |
| <i>Absorption Correction</i> ,                                           | Multi-scan                                                    |
| <i>Max/min</i>                                                           | 0.9819/0.9556                                                 |
| <i>Largest Peak in Final Diff. Map</i> (e <sup>-</sup> Å <sup>-3</sup> ) | 0.201                                                         |

$$* \text{ R} = \sum_{\text{hkl}} (|F_{\text{obs}}| - |F_{\text{calc}}|) / \sum_{\text{hkl}} |F_{\text{obs}}|; \text{ R}_w = [\sum_{\text{hkl}} w(|F_{\text{obs}}| - |F_{\text{calc}}|)^2 / \sum_{\text{hkl}} w F_{\text{obs}}^2]^{1/2},$$

$$w = 1/\sigma^2(F_{\text{obs}}); \text{ GOF} = [\sum_{\text{hkl}} w(|F_{\text{obs}}| - |F_{\text{calc}}|)^2 / (n_{\text{data}} - n_{\text{vari}})]^{1/2}.$$

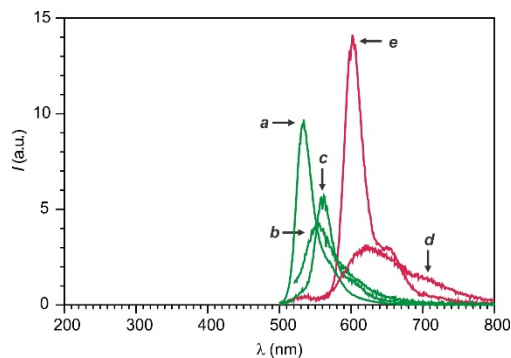

**Figure S1.** Emission spectra (10  $\mu$ M, MeCN, 25  $^{\circ}$ C,  $\lambda_{\text{Ex}}$  for **2**, **3**, **6** and **12** = 480 nm,  $\lambda_{\text{Ex}}$  for **5** = 540 nm) of **12** (*a*), **2** (*b*), **3** (*c*), **5** (*d*) and **6** (*e*).

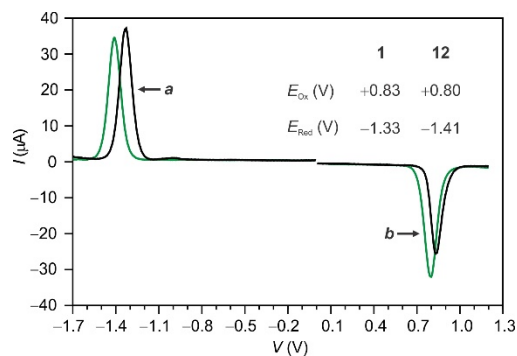

**Figure S2.** Differential pulse voltammograms [1 mM, MeCN,  $\text{Bu}_4\text{NPF}_6$  (0.1 M), V vs. Ag/AgCl, 50  $\text{mV s}^{-1}$ , 50 mV] of **1** (*a*) and **12** (*b*).

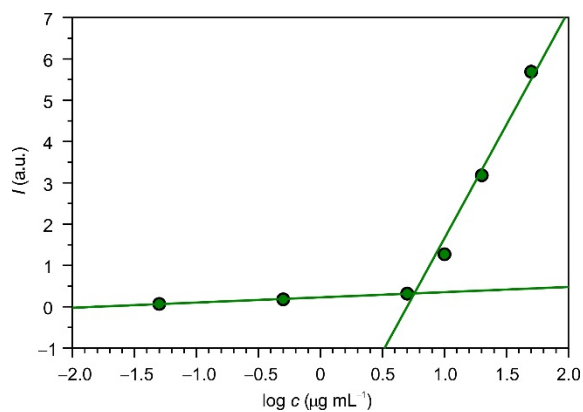

**Figure S3.** Plot of the emission intensity of **12** (5  $\mu\text{g mL}^{-1}$ ,  $\lambda_{\text{Ex}}$  = 470 nm,  $\lambda_{\text{Em}}$  = 536 nm) against the concentration of **13** in PBS at 25  $^{\circ}$ C.

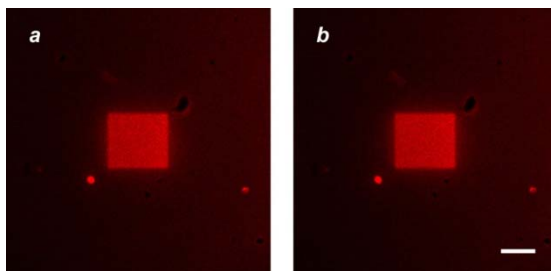

**Figure S4.** Fluorescence images (scale bar = 100  $\mu\text{m}$ ) of a PBMA film, doped with **3** (0.25% w/w), recorded with a  $\lambda_{\text{Ex}}$  of 594 nm and a detection window of 610–700 nm 5 (*a*) and 10 min (*b*) after activation of a rectangular region at a  $\lambda_{\text{Ac}}$  of 405 nm.

### Web Enhanced Object

**Video S1.** Sequence of 43 fluorescence images of an alginate hydrogel, doped with nanoparticles of **13** ( $250 \mu\text{g mL}^{-1}$ ) containing **3** ( $2.5 \mu\text{g mL}^{-1}$ ), recorded with a  $\lambda_{\text{Ex}}$  of 594 nm, a detection window of 610–700 nm and a delay between frames of 15 s after activation of a rectangular region at a  $\lambda_{\text{Ac}}$  of 405 nm for 10 s.

### Web Enhanced Object

**Video S2.** Sequence of 15 fluorescence images of an alginate hydrogel, doped with nanoparticles of **13** ( $250 \mu\text{g mL}^{-1}$ ) containing **12** ( $2.5 \mu\text{g mL}^{-1}$ ), recorded with a  $\lambda_{\text{Ex}}$  of 514 nm, a detection window of 530–650 nm and a delay between frames of 15 s after bleaching of a rectangular region at 405 nm for 60 s.

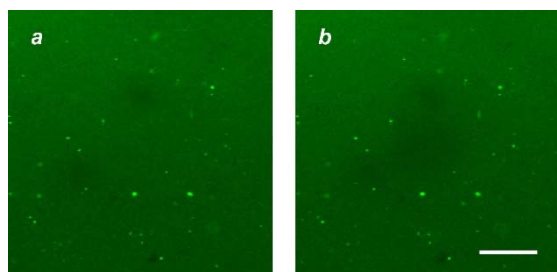

**Figure S5.** Fluorescence images (scale bar = 50  $\mu\text{m}$ ) of an alginate hydrogel, doped with nanoparticles of **13** ( $250 \mu\text{g mL}^{-1}$ ) containing **12** ( $2.5 \mu\text{g mL}^{-1}$ ), recorded with a  $\lambda_{\text{Ex}}$  of 514 nm and a detection window of 530–650 nm before (*a*) and after (*b*) bleaching of a rectangular region at 405 nm for 10 s.

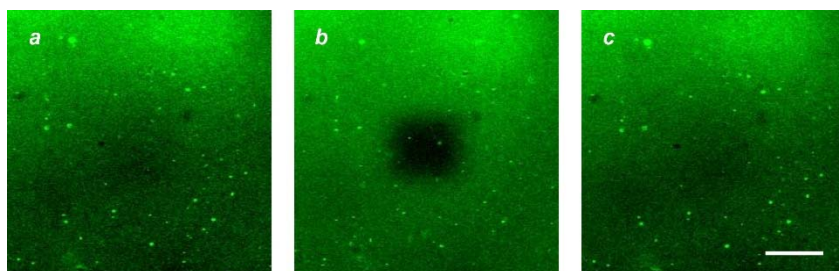

**Figure S6.** Fluorescence images (scale bar = 50  $\mu\text{m}$ ) of an alginate hydrogel, doped with nanoparticles of **13** ( $250 \mu\text{g mL}^{-1}$ ) containing **12** ( $2.5 \mu\text{g mL}^{-1}$ ), recorded with a  $\lambda_{\text{Ex}}$  of 514 nm and a detection window of 530–650 nm before (*a*) and after (*b*) bleaching of a rectangular region at 405 nm for 60 s and 210 s after bleaching (*c*).

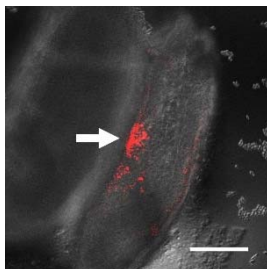

**Figure S7.** Overlaid fluorescence and transmittance images (scale bar = 100  $\mu\text{m}$ ) of two adjacent *Drosophila Melanogaster* embryos, one of which was microinjected with a solution of nanoparticles of **13** (5  $\text{mg mL}^{-1}$ ) containing **3** (50  $\mu\text{g mL}^{-1}$ ) in Dulbecco's PBS, recorded with a  $\lambda_{\text{Ex}}$  of 594 nm and a detection window of 610–700 nm 2250 s after activation of the indicated area at a  $\lambda_{\text{Ac}}$  of 405 nm for 10 s.

### Web Enhanced Object

**Video S3.** Sequence of 15 overlaid fluorescence and transmittance images of two adjacent *Drosophila Melanogaster* embryos, one of which was microinjected with a solution of nanoparticles of **13** (5  $\text{mg mL}^{-1}$ ) containing **3** (50  $\mu\text{g mL}^{-1}$ ) in Dulbecco's PBS, recorded with a  $\lambda_{\text{Ex}}$  of 594 nm, a detection window of 610–700 nm and a delay between frames of 150 s after activation of a portion of the sample at a  $\lambda_{\text{Ac}}$  of 405 nm for 10 s.
